10. Urban P, Mehran R, Collieran R, Angiolillo DJ, Byrne RA, Capodanno D et al. Defining high bleeding risk in patients undergoing percutaneous coronary intervention: a consensus document from the Academic Research Consortium for High Bleeding Risk. *Eur Heart J* 2019;**40**:2632.
11. Oldgren J, Steg PG, Hohnloser SH, Lip GYH, Kimura T, Nordaby M et al. Dabigatran dual therapy with ticagrelor or clopidogrel after percutaneous coronary intervention in atrial fibrillation patients with or without acute coronary syndrome: a subgroup analysis from the RE-DUAL PCI trial. *Eur Heart J* 2019;**40**:1553.
12. Gragnano F, Calabro P, Valgimigli M. Is triple antithrombotic therapy, or rather its duration and composition, the true culprit for the excess of bleeding events observed in patients with atrial fibrillation undergoing coronary intervention? *Eur Heart J* 2019;**40**:216–17.

## EP CASE EXPRESS

doi:10.1093/europace/euz217

Online publish-ahead-of-print 7 August 2019

# A dramatic complication of a subcutaneous implantable cardioverter-defibrillator test: the difficult management of patients and devices when atrial fibrillation and heart failure coexist

Stefano Fumagalli <sup>1\*</sup>, Francesca Maria Nigro<sup>1</sup>, Vanessa Palumbo<sup>2</sup>, Irene Marozzi<sup>1</sup>, Maria Lamassa<sup>2</sup>, and Paolo Pieragnoli<sup>3</sup>

<sup>1</sup>Geriatric Intensive Care Unit and Geriatric Arrhythmia Unit, University of Florence and AOU Careggi, Viale Pieraccini 6, 50139 Florence, Italy; <sup>2</sup>Stroke Unit, University of Florence and AOU Careggi, Florence, Italy; and <sup>3</sup>Electrophysiology Unit, University of Florence and AOU Careggi, Florence, Italy

\* Corresponding author. Tel: +39 055 2758135. E-mail address: stefano.fumagalli@unifi.it

A 69-year-old diabetic man with severe ischaemic heart failure (HF) [left ventricular ejection fraction (LVEF): 30%] was hospitalized for septic shock. He had previously received a primary prevention dual-chamber PM-implantable cardioverter-defibrillator (ICD) and started edoxaban for persistent atrial fibrillation (AF).

At admission, LVEF had worsened (20%). Left atrium was enlarged. A *Staphylococcus aureus* infection caused a warm, reddened, swelling of the pacemaker pouch. TEE excluded endocarditis and atrial thrombosis. Device removal was planned after clinical stabilization; patient significantly improved with antibiotics. A <sup>18</sup>F-FDG positron emission tomography/computed tomography revealed a glucose hypermetabolic state on pacemaker and catheters (Panel A). At 4 weeks, TEE was still negative. Device and leads extraction needed a 72-h anticoagulation stop. Six days later, a subcutaneous ICD was implanted (edoxaban interruption: 24 h). Stable sinus rhythm appeared after the shock test. At 48 h, a stroke (left hemiplegia and dysarthria; NIH Stroke Scale—NIHSS: 18) developed for right middle cerebral artery occlusion (Panel B). Anticoagulation contraindicated thrombolysis; mechanical thrombectomy promptly led to artery recanalization. After 12 h, NIHSS was 5; neurologic evaluation normalized at discharge. After 12 months, subcutaneous ICD shocks, HF, or neurologic episodes were absent. When AF and HF coexist, a careful approach to device management is needed to prevent serious complications.

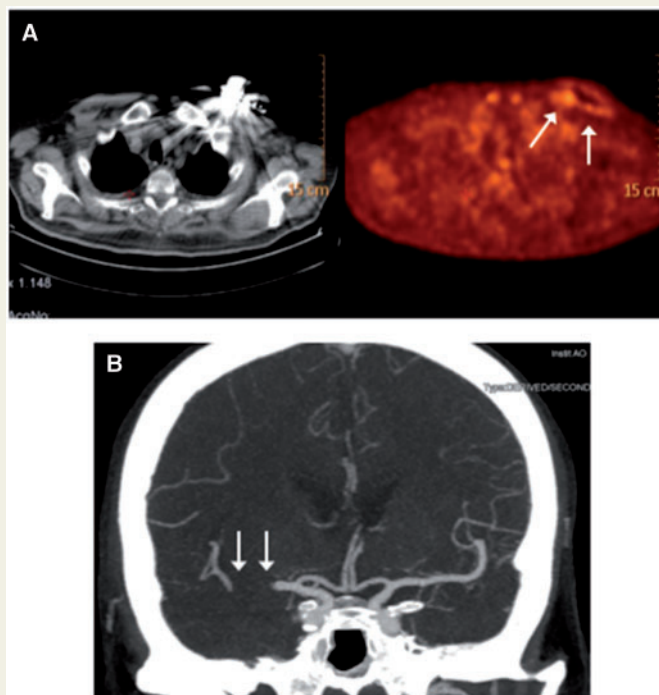

The full-length version of this report can be viewed at: <https://www.escardio.org/Education/E-Learning/Clinical-cases/Electrophysiology>.

Published on behalf of the European Society of Cardiology. All rights reserved. © The Author(s) 2019. For permissions, please email: [journals.permissions@oup.com](mailto:journals.permissions@oup.com).
